# Supplementary material for: Spin-coated planar Sb2S3 hybrid solar cells approaching 5% efficiency
Source: publisher site journal article supplement (doi:10.3762/bjnano.9.200), 2018-08-08
Supplement: Additional file 1 [file 2190-4286-9-200-S1.pdf]

# Supporting Information

for

## Spin-coated planar $\text{Sb}_2\text{S}_3$ hybrid solar cells reaching 5% efficiency

Pascal Kaienburg\*<sup>1</sup>, Benjamin Klingebiel<sup>1</sup> and Thomas Kirchartz\*<sup>1,2</sup>

Address: <sup>1</sup>IEK5-Photovoltaics, Forschungszentrum Jülich, 52425 Jülich, Germany and

<sup>2</sup>Faculty of Engineering and CENIDE, University of Duisburg-Essen, Carl-Benz-Str. 199, 47057 Duisburg, Germany

Email: Pascal Kaienburg\* - paskai@posteo.de, Thomas Kirchartz\* - t.kirchartz@fz-juelich.de

\* Corresponding author

## Additional Figures and Tables

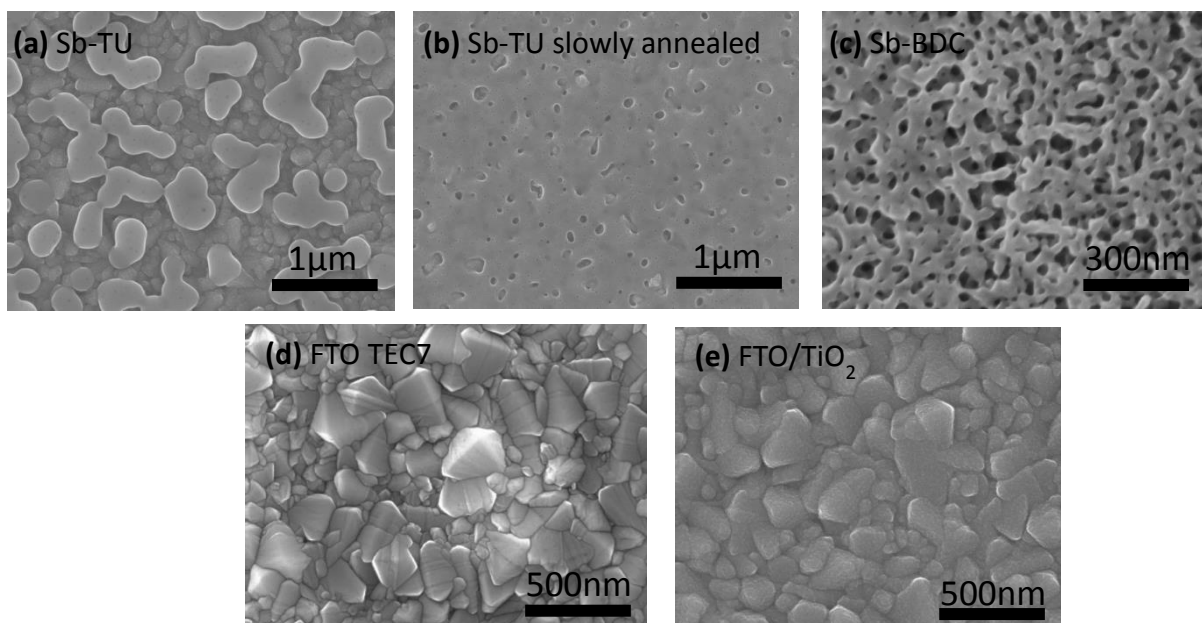

**Figure S1:** SEM images of amorphous samples (a–c) where the precursor is thermally decomposed but films are not yet crystallized. (c) looks like reported in [1]. For clarity bare FTO substrate (d) and TiO<sub>2</sub>-coated FTO (e) is shown as well.

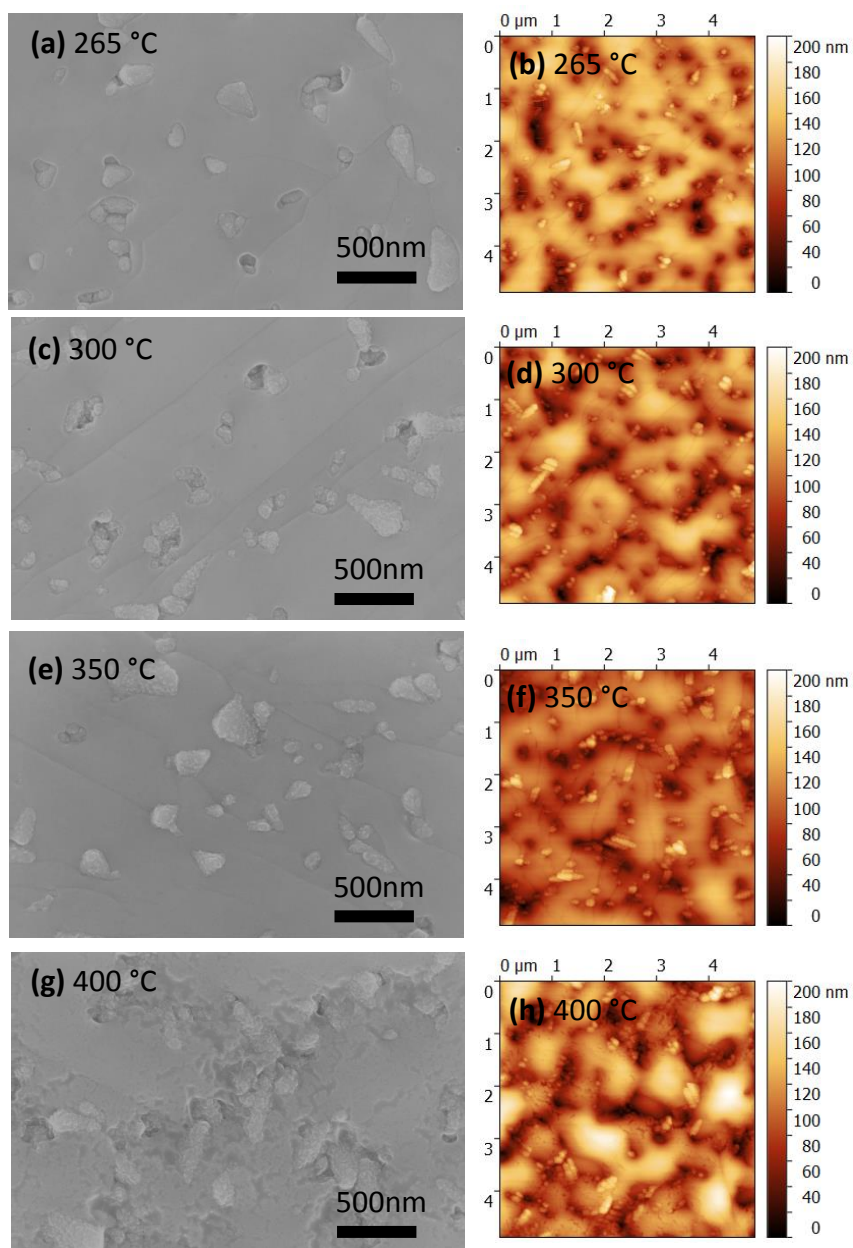

**Figure S2:** SEM (a,c,e,g) and AFM (b,d,f) images of Sb-TU samples crystallized at different temperatures. (a,b,d) are also shown in the main paper.

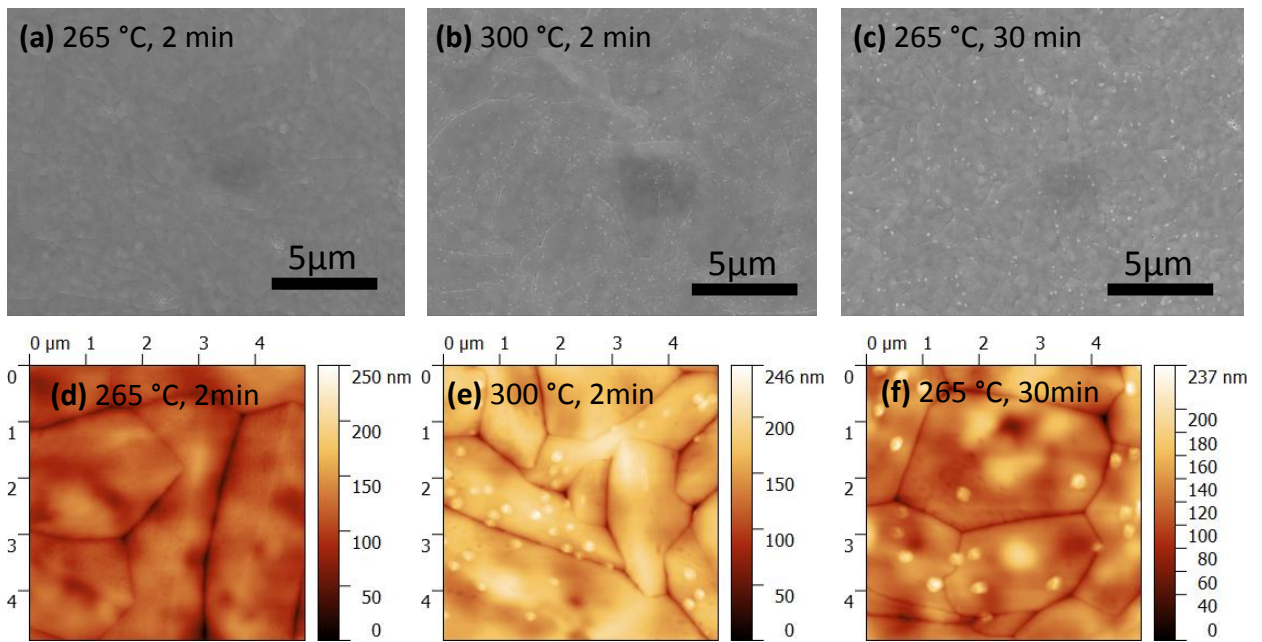

**Figure S3:** Zoomed-out SEM images (a–c) and AFM scans (d–f) of the Sb-BDC process. Grain sizes are similar through (a–c). The underlying FTO morphology is visible. Unlike in (c) and especially (b) no pyramidal features are observed in (a).

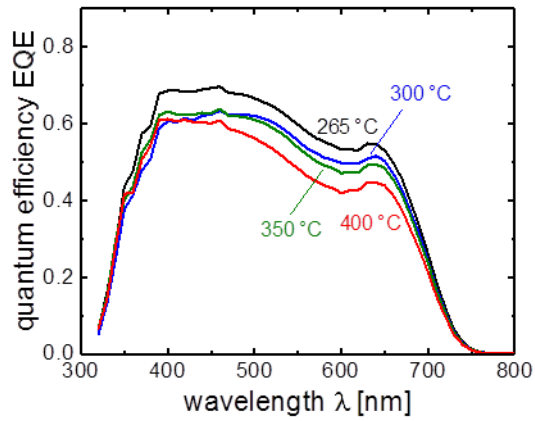

**Figure S4:** External quantum efficiency of the Sb-TU annealing study corresponding to the current–voltage curves shown in Figure 2d.

**Table S1:** Solar cell parameters of the Sb-TU annealing study corresponding to the current–voltage curves shown in Figure 2d.

| $T_{\text{anneal}}$<br>[°C] | $V_{\text{oc}}$<br>[mV] | FF<br>[%] | $J_{\text{sc}}$<br>[mA cm <sup>-2</sup> ] | $J_{\text{sc,EQE}}$<br>[mA cm <sup>-2</sup> ] | PCE<br>[%] | PCE <sub>corr</sub><br>[%] |
|-----------------------------|-------------------------|-----------|-------------------------------------------|-----------------------------------------------|------------|----------------------------|
| 265                         | 570                     | 44.8      | 10.6                                      | 12.0                                          | 2.71       | 3.06                       |
| 300                         | 539                     | 45.6      | 10.1                                      | 11.0                                          | 2.48       | 2.72                       |
| 345                         | 406                     | 42.4      | 10.1                                      | 10.9                                          | 1.74       | 1.87                       |
| 400                         | 280                     | 37.3      | 9.2                                       | 10.0                                          | 0.96       | 1.04                       |

**Table S2:** Solar cell parameters of the Sb-BDC annealing study corresponding to the current–voltage curves shown in Figure 2h.

| $T_{\text{anneal}}$<br>[°C] | $t_{\text{anneal}}$<br>[min] | $V_{\text{oc}}$<br>[mV] | FF<br>[%] | $J_{\text{sc}}$<br>[mA cm <sup>-2</sup> ] | PCE<br>[%] |
|-----------------------------|------------------------------|-------------------------|-----------|-------------------------------------------|------------|
| 265                         | 2                            | 605                     | 46.1      | 14.1                                      | 3.94       |
| 300                         | 2                            | 567                     | 41.0      | 13.0                                      | 3.02       |
| 265                         | 30                           | 563                     | 43.7      | 13.0                                      | 3.19       |

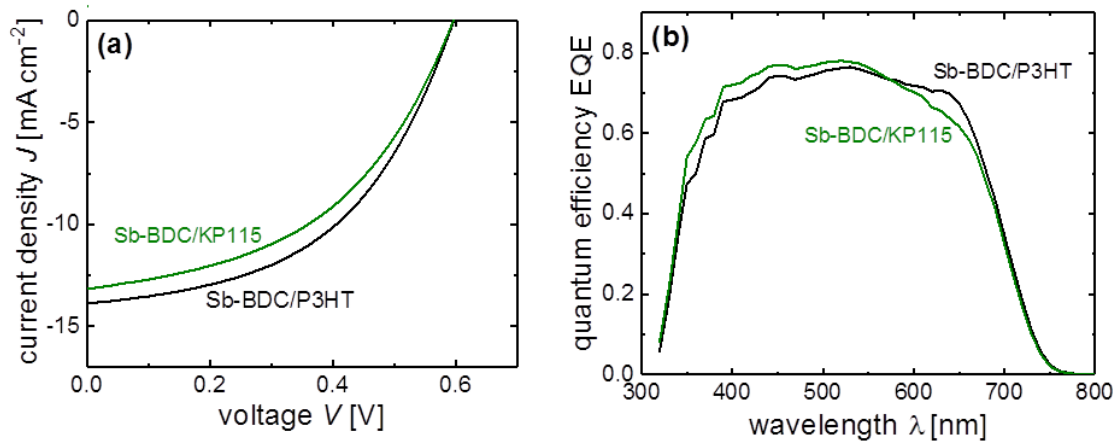

**Figure S5:** Comparison of the Sb-BDC process with KP115 as HTM shown in the main part with a P3HT device fabricated on the same day which did not reach the efficiency of the  $\text{Sb}_2\text{S}_3/\text{P3HT}$  cell presented in the main paper.

## References

- (1) Wang, X.; Li, J.; Liu, W.; Yang, S.; Zhu, C.; Chen, T. *Nanoscale* **2017**, *9*, 3386–3390. doi:[10.1039/C7NR00154A](https://doi.org/10.1039/C7NR00154A)
